# Supplementary material
Source: Springer Nature journal article supplement (https://www.springermedizin.de/resource/supplementary/12936_2012_2445_MOESM2_ESM.pdf/9542932)

## TLC analysis of *D. tomentosa* extracts tested *in vitro* for antiplasmodial activity

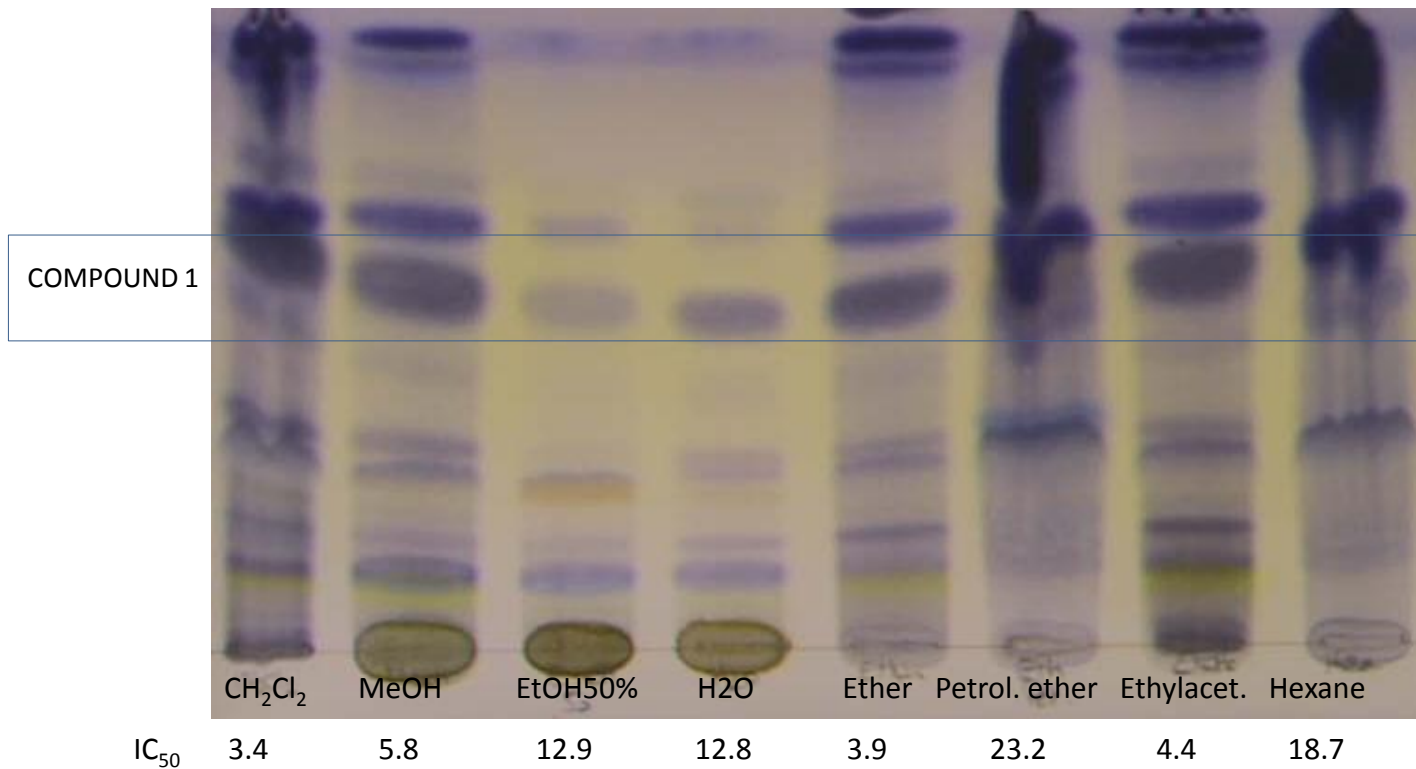

IC<sub>50</sub> in µg/ml (*P. falciparum* 3D7)

Mobile phase : CH<sub>2</sub>Cl<sub>2</sub> - MeOH (95:5)

Revealed using sulphuric vanillin reagent (see Materials and methods)

## Bioguided fractionation of *D. tomentosa*

IC<sub>50</sub> in µg/ml (*P. falciparum* 3D7)

Right : TLC

Extracts (CH<sub>2</sub>Cl<sub>2</sub> total crude extract, E1 and E2 (subsequent hexane and CH<sub>2</sub>Cl<sub>2</sub> extracts, in this order respectively)

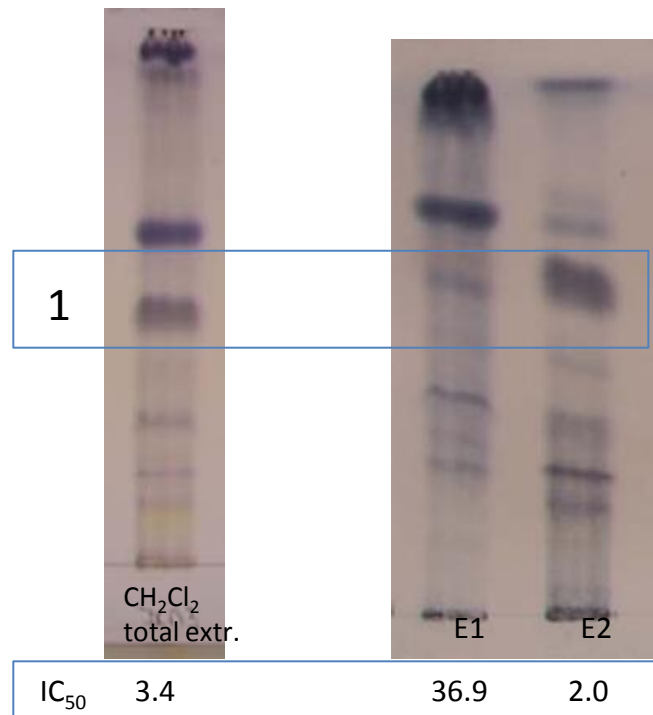

Below: TLC

Fractions collected from preparative HPLC (E2)

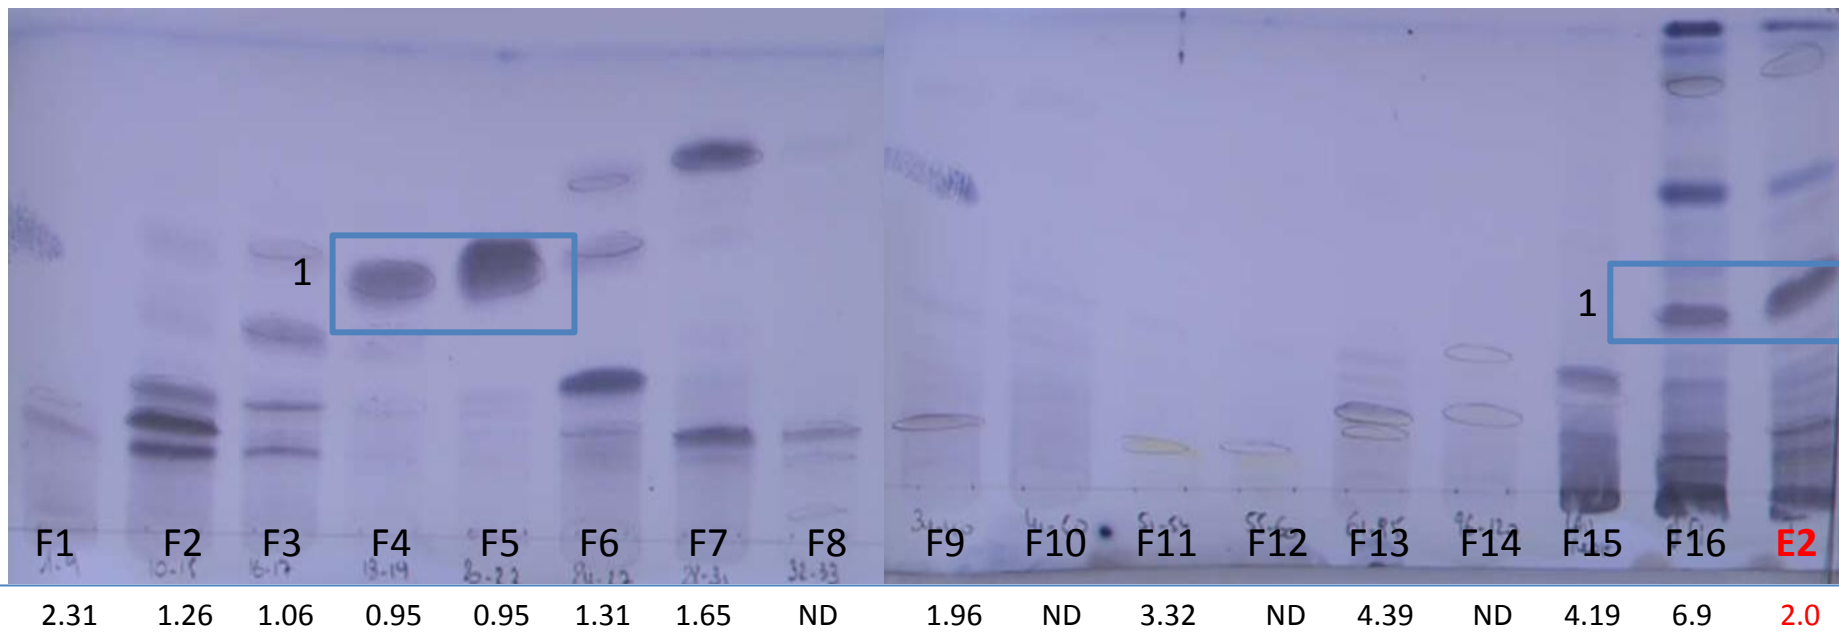

Supplement: MOESM2 [file 9542932]
